# Supplementary material for: Multi-Point Flexible Temperature Sensor Array and Thermoelectric Generator Made from Copper-Coated Textiles
Source: Sensors (Basel). 2021 May 28;21(11):3742. doi: 10.3390/s21113742 (PMC8198943; doi:10.3390/s21113742)
Supplement: Supplementary file 1 [file sensors-21-03742-s001.zip › sensors-1210100-supplementary.pdf]

## Multi point flexible temperature sensor array and thermoelectric generator made from copper-coated textiles

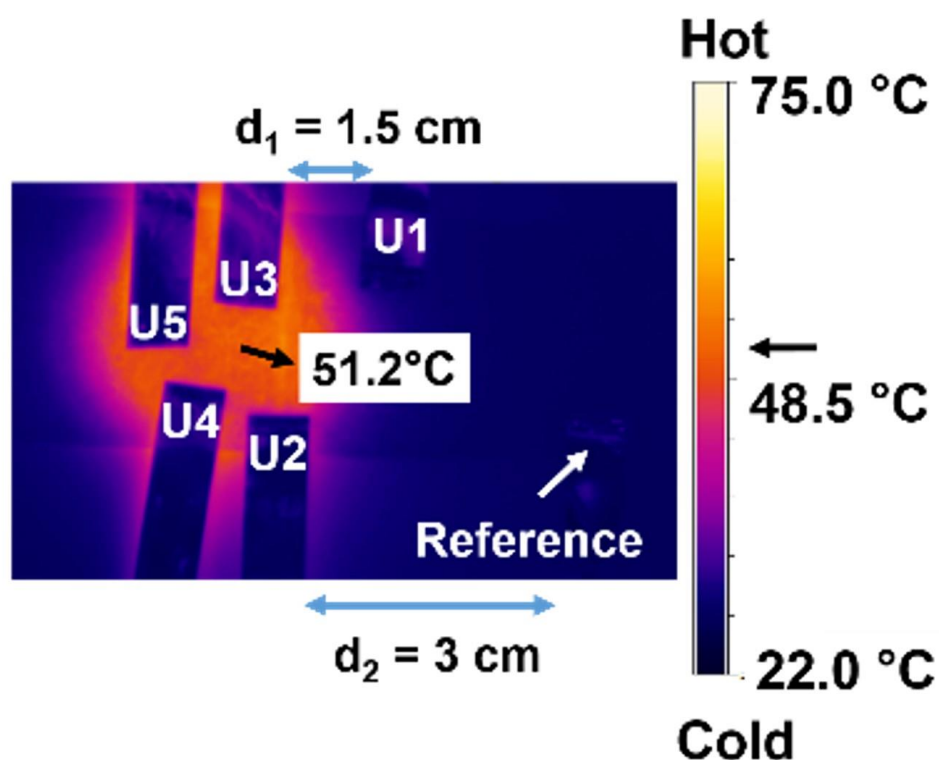

**Figure S1.** Thermal image of the measurement arrangement of the thermo-sensor.

|                                                                                            |                                |                                              |                           |                              |                      |
|--------------------------------------------------------------------------------------------|--------------------------------|----------------------------------------------|---------------------------|------------------------------|----------------------|
| Coating details (calculation as a continuous film)                                         |                                |                                              |                           |                              |                      |
| Copper content                                                                             | Silver content                 | Coating total                                | Sample total              | Textile weight               | Sample size          |
| 147 mg/g                                                                                   | 6.5 mg/g                       | 153.5 mg/g sample                            | 0.8465 mg                 | 143 g/10,000 cm <sup>2</sup> | 59.2 cm <sup>2</sup> |
| Copper density                                                                             | coating thickness total (film) |                                              |                           |                              |                      |
| 8.96 g/cm <sup>3</sup>                                                                     | 0.000277 cm                    |                                              |                           |                              |                      |
|                                                                                            | 2.771522 μm                    |                                              |                           |                              |                      |
| Fabric details                                                                             |                                |                                              |                           |                              |                      |
| 31 threads per cm                                                                          | 62 threads per cm?             | ?                                            |                           |                              |                      |
| 100 fibers per thread ?                                                                    |                                |                                              |                           |                              |                      |
| Fiber diameter                                                                             | Fiber surface per 1 cm         | surface of 1 yarn per 1 cm                   |                           |                              |                      |
| 10 μm                                                                                      | 0.003142 cm <sup>2</sup>       | 0.314159265 cm <sup>2</sup>                  |                           |                              |                      |
| Consideration:                                                                             |                                |                                              |                           |                              |                      |
| 0.5 coating ratio in spots w/o crossing points                                             |                                |                                              | 0.33 ratio of fabric size |                              |                      |
| 0.25 coating ratio in spots showing crossing points                                        |                                |                                              | 0.67 ratio of fabric size |                              |                      |
| Total coated surface area of fabric                                                        |                                | Coating thickness under these considerations |                           |                              |                      |
| 6.476393 cm <sup>2</sup>                                                                   |                                | 0.428 μm                                     |                           |                              |                      |
|                                                                                            |                                |                                              |                           |                              |                      |
| 0.142 μm if all fibers are covered completely                                              |                                |                                              |                           |                              |                      |
| 0.285 μm if 50% of the total fibers are covered completely                                 |                                |                                              |                           |                              |                      |
| 0.428 μm if 50% of single yarns are coated and 25% of fibers at crossing points are coated |                                |                                              |                           |                              |                      |
| 0.517 μm if the crossingpoint ratio is 9/1                                                 |                                |                                              |                           |                              |                      |
| 0.569 μm if there are only crossing points                                                 |                                |                                              |                           |                              |                      |

**Figure S2.** Calculation of the copper layer thickness under consideration of differently coated areas all over the fabric. The calculation also takes the fiber fineness and the deposited amounts of copper and silver into account.
